# Supplementary material
Source: PubMed Central journal article supplement (PMC4545476)
Supplement: NIHMS699260-supplement-001026_-_Supplemental_Material.pdf [file NIHMS699260-supplement-001026_-_Supplemental_Material.pdf]

## SUPPLEMENTAL MATERIAL

### Supplementary Tables

**Supplementary Table 1.** All genes with shared rare mutations between WES affecteds and not shared by WES unaffecteds. Bold, implicated LVNC gene. Underline, known cardiomyopathy gene.

| Family | Genes                                                                                                                                                                                                                                                                                                                                                                                                                                                                                                                                                                                                            |
|--------|------------------------------------------------------------------------------------------------------------------------------------------------------------------------------------------------------------------------------------------------------------------------------------------------------------------------------------------------------------------------------------------------------------------------------------------------------------------------------------------------------------------------------------------------------------------------------------------------------------------|
| A      | CANT1, CHRNE, ERCC8, EVPL, EXOC7, FOXA2, GPR98, KIAA1324, MRPS15, MTG1, <u>MYH6</u> , NBPF3, PDE4DIP, RSPH4A, SLC25A23, TMC1, TOR1B, <b>TPM1</b> , TRIP10, USP8, ZNF280D, ZNF644                                                                                                                                                                                                                                                                                                                                                                                                                                 |
| B      | ANKRD36, CCDC150, CDC27, CNTNAP4, DCHS2, DNAH10, DRG1, MAL2, <b>MYH7</b> , OR11G2, PSAPL1, RP1L1, TRIL                                                                                                                                                                                                                                                                                                                                                                                                                                                                                                           |
| C      | A4GNT, AGBL5, ALPK2, BHMT2, C2orf16, COL5A3, CR2, FBXO4, FCRL2, FLG, FLG, FRRS1, GSDMC, MAP1S, MMP12, <b>NNT*</b> , OR52W1, PNN, PSAP, RSPH3, TOR1AIP1, VPS41, ZNF180, ZNF181, ZNF229                                                                                                                                                                                                                                                                                                                                                                                                                            |
| D      | ACOT4, AHI1, ANAPC2, ASXL3, ATP4B, BBX, BMP1, BTBD10, <u>CACNG2</u> , CADM4, CASZ1, CCDC158, CCDC66, CHID1, COL6A1, CPE, DCX, DMXL2, DNM1, DUPD1, EPPK1, FBRSL1, FCHO2, GFM2, GPC1, GPR176, GREB1, HAL, HCCS, HOXB2, HSP90B1, INPP5D, KIF26A, LAMA1, LSG1, MAP2, MAST3, MED16, MEX3A, MRPL39, MTHFD1, MTHFD1L, <b>MYH7</b> , N4BP2, NAP1L1, NAV1, NEDD4L, NOTCH3, OR52I2, OSMR, PARP1, PEPD, PLXNA4, PPIP5K2, PPP1R12C, PTH2R, SBF1, SCN11A, SCN7A, SEMA3G, SI, SLC16A3, SLC22A5, SLC45A2, SLC45A4, SMPD4, SPEF2, STRAP, TCEA1, TIMM44, TMEM180, TOP2A, TRIM59, UMOD, UNKL, WDFY4, WDR4, ZNF354B, ZNF451, ZNF646 |
| E      | ARSB, BRCA2, FAM38A, FRRS1, MAGI3, <b>MYH7</b> , NOVA1, RNF6, SLAIN1, TEP1                                                                                                                                                                                                                                                                                                                                                                                                                                                                                                                                       |

**Supplementary Table 2. LVNC cohort data.** LVNC cohort used for *NNT* sequencing. All cohort members were diagnosed with LVNC. Gender and additional phenotype information is listed. Samples used for *MYH7* sequencing are indicated, with any discovered *MYH7* mutations and any previous descriptions.

| Patient ID# | Gender | Additional Phenotype                                                                                                                                                                                                                   | Used in <i>MYH7</i> Sequencing Study | <i>MYH7</i> Mutation(s) | Previous Description          |
|-------------|--------|----------------------------------------------------------------------------------------------------------------------------------------------------------------------------------------------------------------------------------------|--------------------------------------|-------------------------|-------------------------------|
| L051        | F      | DISEASE ONSET-BIRTH. POST DELIVERY, AVA PRESENTED WITH PERSISTENT HYPOXIA AND RESPIRATORY DISTRESS, PULMONARY HYPERTENSION, HYPOTENSION AND WAS DIAGNOSED WITH LVNC AND VSD'S. DEVELOPED THROMBOSIS IN LEFT ATRIUM AND LEFT VENTRICLE. | 1                                    | N/A                     |                               |
| L100        | F      | LVNC, VENTRICULAR SEPTAL DEFECT, SMALL NORMAL LV SIZE, LVEF 47% BY MRI                                                                                                                                                                 | 1                                    | p.Q163P                 |                               |
| L012        | M      | Present at 15 days age-cyanosis                                                                                                                                                                                                        | 1                                    | N/A                     |                               |
| L030        | F      | Genetic Analysis for alpha- dystrophin                                                                                                                                                                                                 | 1                                    | p.R1045H, p.T547A       | Frisso et al. CLIN GENET 2009 |
| L034        | M      | AGE OF DISEASE ONSET: 6 YEARS, Dyspnea, sporadic palpitations. NYHA class II. Echocardiogram was compatible with non-compaction cardiomyopathy, mitral stenosis and mild mitral regurgitation.                                         | 1                                    | N/A                     |                               |
| L040        | F      | presented with cardiac arrest on day 7 of life. >25 of possible arrest with ischemicencepholopathy. Initial LV SF<15%-3 days later= he fxn but poss/prob noncompaction seen on                                                         | 1                                    | N/A                     |                               |

|      |   |                                                                                                                                                                                                                                              |   |         |                           |
|------|---|----------------------------------------------------------------------------------------------------------------------------------------------------------------------------------------------------------------------------------------------|---|---------|---------------------------|
|      |   | echo.                                                                                                                                                                                                                                        |   |         |                           |
| L044 | F | asymptomatic, identified by echocardiogram                                                                                                                                                                                                   | 1 | N/A     |                           |
| L046 | F | age 13 so born in 1991;vheart failure                                                                                                                                                                                                        | 1 | N/A     |                           |
| L054 | M | NON COMPACTION CM, HOCM                                                                                                                                                                                                                      | 1 | N/A     |                           |
| L058 | F |                                                                                                                                                                                                                                              | 1 | p.M531R | Kaneda et al. CS(L), 2008 |
| L060 | F |                                                                                                                                                                                                                                              | 1 | N/A     |                           |
| L061 | M |                                                                                                                                                                                                                                              | 1 | N/A     |                           |
| L131 | F | CARDIAC US AT AGES 1 YEAR AND 6 YEARS - NORMAL; AT AGE OF 8, SYSTOLIC MURMUR WAS HEARD AND LEFT ATRIUM WAS MILDLY ENLARGED; 6/2005, CATHETHRISATION AND IN THE APEX OF LEFT VENTRICLE TRABECULATIONS WERE SEEN, HAS ANTICOAGULANT MEDICATION | 1 | N/A     |                           |
| L069 | M |                                                                                                                                                                                                                                              | 1 | N/A     |                           |
| L119 | M | patient is proband                                                                                                                                                                                                                           | 1 | N/A     |                           |
| L086 | F | pronounced biventricular involvement. Died in 2002.                                                                                                                                                                                          | 1 | N/A     |                           |
| L025 | F | 21 MONTHS, severe left ventricular dysfunction; isolated left ventricular non-compaction.                                                                                                                                                    | 1 | N/A     |                           |
| L092 | F | Symptoms include: heart failure, Dx of ventricular noncompaction                                                                                                                                                                             | 1 | N/A     |                           |
| L094 | F | LV non-compaction ascertained 2003 (age 34). Neonatal VSD, unrepaired.                                                                                                                                                                       | 1 | N/A     |                           |
| L095 | F | VSD, LV DYSFUNCTION                                                                                                                                                                                                                          | 1 | N/A     |                           |
| L098 | M | WPW, DCM, LVNC                                                                                                                                                                                                                               | 1 | N/A     |                           |

|      |   |                                                                                                              |   |          |                                  |
|------|---|--------------------------------------------------------------------------------------------------------------|---|----------|----------------------------------|
| L099 | M |                                                                                                              | 1 | N/A      |                                  |
| L102 | M |                                                                                                              | 0 | N/A      |                                  |
| L104 | F | DX LVNC, NO SYMPTOMS                                                                                         | 0 | N/A      |                                  |
| L109 | M | Mitral Valve Prolapse                                                                                        | 1 | N/A      |                                  |
| L110 | F | LVNC, HCM                                                                                                    | 1 | N/A      |                                  |
| L111 | M | LVNC, HCM                                                                                                    | 1 | N/A      |                                  |
| L112 | F |                                                                                                              | 1 | N/A      |                                  |
| L117 |   |                                                                                                              | 1 | p.R904H  | Waldmüller et al.<br>EJHF , 2011 |
| L122 |   |                                                                                                              | 1 | N/A      |                                  |
| L123 | M | DX LVNC, NO SYMPTOMS                                                                                         | 1 | N/A      |                                  |
| L127 | M |                                                                                                              | 1 | p.E1350K |                                  |
| L132 | F |                                                                                                              | 1 | N/A      |                                  |
| L134 | M | Brother is affected with DCM, parents are first cousins                                                      | 1 | N/A      |                                  |
| L135 | M | mother died at age 37 of cardiomyopathy                                                                      | 1 | N/A      |                                  |
| L137 | F | Both siblings and mother affected with LVNC and HCM                                                          | 1 | p.L915P  |                                  |
| L139 | F | Sister died at day 17 with LVNC                                                                              | 1 | N/A      |                                  |
| L141 | M |                                                                                                              | 0 | N/A      |                                  |
| L143 | M |                                                                                                              | 0 | N/A      |                                  |
| L008 | M | Dilated Cardiomyopathy and hypotonia                                                                         | 1 | N/A      |                                  |
| L009 | M | Present in infancy with cyanosis as a result of congenital heart disease.                                    | 1 | N/A      |                                  |
| L010 | M | Present in 1997 (6 years old) with acute myocarditis associated with bradycardia due to varying heart block. | 1 | N/A      |                                  |
| L011 | M | Diagnosed in infancy with cyanotic congenital heart disease                                                  | 1 | N/A      |                                  |
| L014 | M | Present at age 9 (July 01) with congestive failure                                                           | 1 | N/A      |                                  |
| L020 | M |                                                                                                              | 0 | N/A      |                                  |

|      |   |                                                                                                                                                           |   |         |                                                                                                                                                                                          |
|------|---|-----------------------------------------------------------------------------------------------------------------------------------------------------------|---|---------|------------------------------------------------------------------------------------------------------------------------------------------------------------------------------------------|
| L022 | F | POST-PART. CM DX1990.<br>NON-COMPACTION OF<br>LV DX 1996.                                                                                                 | 1 | p.L961P | L>R has been reported<br><a href="http://genepath.med.harvard.edu/seidman/cg3/muts/MYH7_mutations_TOC.html">http://genepath.med.harvard.edu/seidman/cg3/muts/MYH7_mutations_TOC.html</a> |
| L023 | M | CHF. DCM WITH SPONG<br>MYOCARDIUM AND<br>VACTERL.                                                                                                         | 1 | N/A     |                                                                                                                                                                                          |
| L026 | M | ISOLATED LVNC WITH<br>HLHS                                                                                                                                | 1 | N/A     |                                                                                                                                                                                          |
| L031 | F | Diagnosed with LVNC<br>following a sudden<br>cardiac arrest and her<br>daughters have been<br>diagnosed with an<br>asymptomatic form on<br>echocardiogram | 1 | p.R243H | <a href="http://genepath.med.harvard.edu/seidman/cg3/muts/MYH7_mutations_TOC.html">http://genepath.med.harvard.edu/seidman/cg3/muts/MYH7_mutations_TOC.html</a>                          |
| L050 | F |                                                                                                                                                           | 0 | N/A     |                                                                                                                                                                                          |
| L079 | F | LVNC. 3 BEAT RUN OF VT                                                                                                                                    | 1 | N/A     |                                                                                                                                                                                          |
| L084 | M |                                                                                                                                                           | 0 | N/A     |                                                                                                                                                                                          |
| L085 | F | mother and daughter<br>both have LVNC, found to<br>have same pathology                                                                                    | 1 | N/A     |                                                                                                                                                                                          |
| L087 | F | CONGESTIVE HEART<br>FAILURE AT 3 MONTHS<br>OLD. PRESENTED WITH<br>PULMONARY EDEMA.                                                                        | 1 | N/A     |                                                                                                                                                                                          |
| L121 | M |                                                                                                                                                           | 0 | N/A     |                                                                                                                                                                                          |
| L129 | M | INCREASED DYSPNEA<br>AND LVH ON<br>ECHOCARDIOGRAM. MRI<br>SHOWS LVNC                                                                                      | 1 | N/A     |                                                                                                                                                                                          |
| L130 | M | Early puberty,<br>Pediatrician heard<br>cardiac click sent for<br>echo, LV non-compaction<br>found; subsequently dad<br>had echo showing DCM              | 1 | N/A     |                                                                                                                                                                                          |

**Supplementary Table 3.** Genes and rare variants identified in LVNC Family C that are shared between WES affecteds, but not shared by WES unaffected.

| Gene name | Nucleotide: Amino acid Variant (heterozygous) | Nucleotide sequence | Mutation type       | Human disease association (OMIM)                 | Mouse mutant phenotypes (MGI)                                                                                                            |
|-----------|-----------------------------------------------|---------------------|---------------------|--------------------------------------------------|------------------------------------------------------------------------------------------------------------------------------------------|
| A4GNT     | c.G803T:<br>p.W268L                           | NM_016161           | nonsynonymous       |                                                  | cardiovascular (increased angiogenesis in the gastric mucosa), cellular, digestive/alimentary, immune, tumorigenesis                     |
| AGBL5     | c.791_794del:<br>p.264_265del                 | NM_0218314          | frameshift deletion |                                                  |                                                                                                                                          |
| ALPK2     | c.C772T: p.R258C                              | NM_052947           | nonsynonymous       |                                                  |                                                                                                                                          |
| BHMT2     | c.C565T: p.P189S                              | NM_017614           | nonsynonymous       |                                                  |                                                                                                                                          |
| C2orf16   | c.C730G:<br>p.R244G                           | NM_032266           | nonsynonymous       |                                                  |                                                                                                                                          |
| COL5A3    | c.C1648T:<br>p.R550C                          | NM_015719           | nonsynonymous       |                                                  | adipose, cellular, endocrine/exocrine, growth/size, homeostasis, integument, muscle                                                      |
| CR2       | c.G641A:<br>p.R214H                           | NM_001877           | nonsynonymous       | Immunodeficiency, common variable, 7 [MIM614699] | hematopoietic, immune, mortality/aging                                                                                                   |
| FBXO4     | c.A676G:<br>p.N226D                           | NM_012176           | nonsynonymous       |                                                  | cellular, hematopoietic, immune, mortality/aging, tumorigenesis                                                                          |
| FCRL2     | c.G952T: p.E318X                              | NM_030764           | nonsense            |                                                  | hematopoietic, immune                                                                                                                    |
| FLG       | c.G4533C:<br>p.R1511S                         | NM_002016           | nonsynonymous       | Ichthyosis vulgaris [MIM 146700]                 | cellular, craniofacial, growth/size, hearing/vestibular/ear, hematopoietic, homeostasis, immune, integument, mortality/aging             |
| FLG       | c.G2280C:<br>p.Q760H                          | NM_002016           | nonsynonymous       |                                                  |                                                                                                                                          |
| FRRS1     | c.T1292C:<br>p.M431T                          | NM_001013660        | nonsynonymous       |                                                  | mortality/aging                                                                                                                          |
| GSDMC     | c.G590A:<br>p.S197N                           | NM_031415           | nonsynonymous       |                                                  | behavior, craniofacial, digestive/alimentary, growth/size, hearing/vestibular/ear, homeostasis, integument, mortality/aging, respiratory |

|          |                         |                |                     |                                                                                                                                                                                               |                                                                                                                                                              |
|----------|-------------------------|----------------|---------------------|-----------------------------------------------------------------------------------------------------------------------------------------------------------------------------------------------|--------------------------------------------------------------------------------------------------------------------------------------------------------------|
| MAP1S    | c.C128G: p.S43C         | NM_018174      | nonsynonymous       |                                                                                                                                                                                               | cardiovascular (cardiomyocytes in neonates and adult exhibit a 3-fold increase in dysfunctional mitochondria compared with wild-type mice), cellular, muscle |
| MMP12    | c.G697T: p.A233S,       | uc001phk.3     | nonsynonymous       |                                                                                                                                                                                               | hematopoietic, homeostasis, immune, nervous system, reproductive                                                                                             |
| NNT*     | c.638_639insT: p.R213fs | NM_012343      | frameshift deletion | Glucocorticoid deficiency 4 [MIM614736]                                                                                                                                                       | cellular, endocrine/exocrine, homeostasis, cardiovascular (lower LV shortening and increased LV weight, higher aortic ejection time)                         |
| OR52W1   | c.G923A: p.R308Q        | NM_00100517    | nonsynonymous       |                                                                                                                                                                                               |                                                                                                                                                              |
| PNN      | c.A1264G: p.S422G       | NM_002687      | nonsynonymous       |                                                                                                                                                                                               | embryogenesis, mortality/aging, vision/eye                                                                                                                   |
| PSAP     | c.C409G: p.L137V        | NM_00104246 5V | nonsynonymous       | Combined SAP deficiency [MIM611721]<br>Gaucher disease, atypical [610539]<br><br>Krabbe disease, atypical [MIM611722]<br><br>Metachromatic leukodystrophy due to SAP-b deficiency [MIM249900] | behavior, growth/size, hematopoietic, homeostasis, immune, mortality/aging, nervous system, reproductive, skeleton                                           |
| RSPH3    | c.C1126T: p.R376W       | NM_031924      | nonsynonymous       |                                                                                                                                                                                               |                                                                                                                                                              |
| TOR1AIP1 | c.T983G: p.I328S        | NM_015602      | nonsynonymous       |                                                                                                                                                                                               | cellular, mortality/aging                                                                                                                                    |
| VPS41    | c.C881T: p.T294M        | NM_014396      | nonsynonymous       |                                                                                                                                                                                               | cellular, embryogenesis, mortality/aging                                                                                                                     |
| ZNF180   | c.A1513G: p.S505G       | NM_013256      | nonsynonymous       |                                                                                                                                                                                               |                                                                                                                                                              |
| ZNF181   | c.A352G: p.K118E        | NM_00102999 7  | nonsynonymous       |                                                                                                                                                                                               |                                                                                                                                                              |

|        |                      |           |               |  |  |
|--------|----------------------|-----------|---------------|--|--|
| ZNF229 | c.G1537C:<br>p.G513R | NM_014518 | nonsynonymous |  |  |
|--------|----------------------|-----------|---------------|--|--|



**Supplementary Table 4. Morpholinos used for *in vivo* functional assays.** Relationship of the variants identified in LVNC family C to the zebrafish morpholinos (MO)s used for assays of physiological relevance and variant pathogenicity. \*Variants in *HACL1*, *NAV2*, *RAB27A*, and *RBM28* are present in <0.01% of controls (Exome Variant Server), shared by the affected individuals but do not segregate fully with disease in the pedigree. \*\**notch1a* MO was published previously<sup>1</sup>.

| Human gene    | Variant in LVNC Family C* | Zebrafish gene    | MO sequence                |
|---------------|---------------------------|-------------------|----------------------------|
| <i>NNT</i>    | c.638_639insT<br>p.R213fs | <i>nnt-a</i>      | ACCATTGTCAGAGGACTTACCCAGC  |
|               |                           | <i>nnt-b</i>      | GTAAGTGTGGATGTTTCACCTTCGC  |
| <i>HACL1</i>  | c.G1036T<br>p.E346X       | <i>hacl1</i>      | GTTGAAATATTCATACCGTCCAGTC  |
| <i>NAV2</i>   | c.C3071G<br>p.S1024W      | <i>nav2</i>       | TTTTGAAGTGTTTTTACCTTCAGCT  |
| <i>RAB27A</i> | c.C518G<br>p.A173G        | <i>rab27a</i>     | AAGGATTTTCTTACCCGTATTTCTC  |
| <i>RBM28</i>  | c.G1488C<br>p.K496N       | <i>rbm28</i>      | ACTTGGTCAAAC TTTTACCTGGTTT |
| <i>NOTCH1</i> | Not applicable            | <i>notch1a</i> ** | GAAACGGTTCATAACTCCGCCTCGG  |

## Supplementary Figures

Supplementary Figure 1A. Pedigree, sequencing platform and sequence coverage for each family **A**. LVNC status for each individual is given: Black (affected), white (unaffected), gray (unknown status), \* indicates subject was capture sequenced.

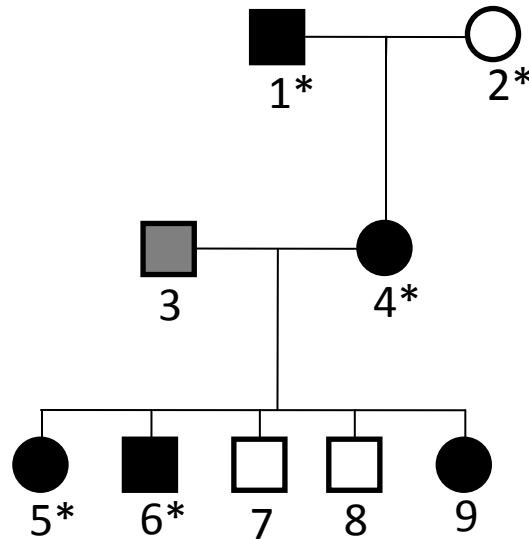

| ID | Platform | Gbp | Avg Cov | % 10x |
|----|----------|-----|---------|-------|
| 1  | SOLiDv4  | 6.9 | 26      | 64.4  |
| 2  | SOLiDv4  | 6.8 | 26      | 64.4  |
| 4  | SOLiDv4  | 7.1 | 26      | 64.5  |
| 5  | SOLiDv4  | 6.6 | 24      | 61.4  |
| 6  | SOLiDv4  | 6.7 | 25      | 64.0  |

Supplementary Figure 1B. Pedigree, sequencing platform and sequence coverage for family B.

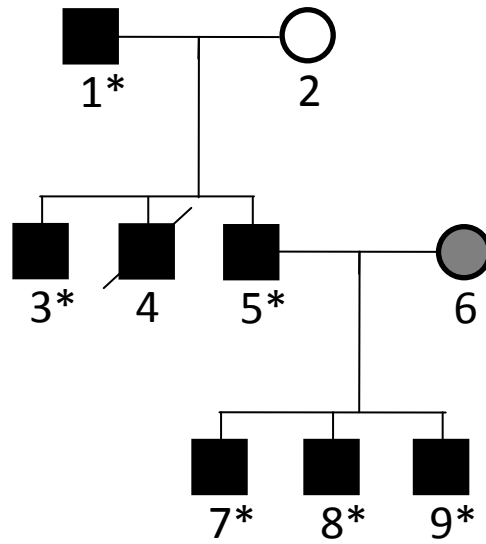

| ID | Platform | Gbp  | Avg Cov | % 10x |
|----|----------|------|---------|-------|
| 1  | Illumina | 16.3 | 195     | 96.2  |
| 3  | Illumina | 10.2 | 128     | 95.0  |
| 7  | Illumina | 16.3 | 184     | 94.1  |
| 8  | Illumina | 12.0 | 153     | 95.7  |
| 9  | Illumina | 11.3 | 142     | 95.8  |

Supplementary Figure 1C. Pedigree, sequencing platform and sequence coverage for family C.

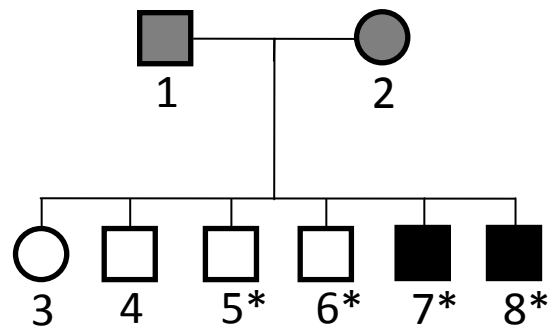

| ID | Platform | Gbp | Avg Cov | % 10x |
|----|----------|-----|---------|-------|
| 5  | Illumina | 8.3 | 103     | 84.0  |
| 6  | Illumina | 8.4 | 105     | 88.3  |
| 7  | Illumina | 6.0 | 70      | 74.3  |
| 8  | Illumina | 7.1 | 84      | 78.0  |

Supplementary Figure 1D. Pedigree, sequencing platform and sequence coverage for family **D**.

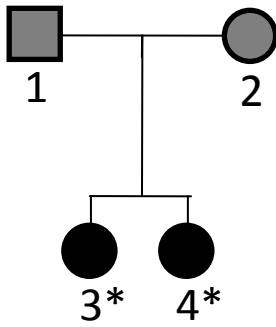

| ID | Platform | Gbp | Avg Cov | % 10x |
|----|----------|-----|---------|-------|
| 3  | SOLiDv4  | 7.3 | 28      | 67.6  |
| 4  | SOLiDv4  | 7.6 | 27      | 66.9  |

Supplementary Figure 1D. Pedigree, sequencing platform and sequence coverage for family D.

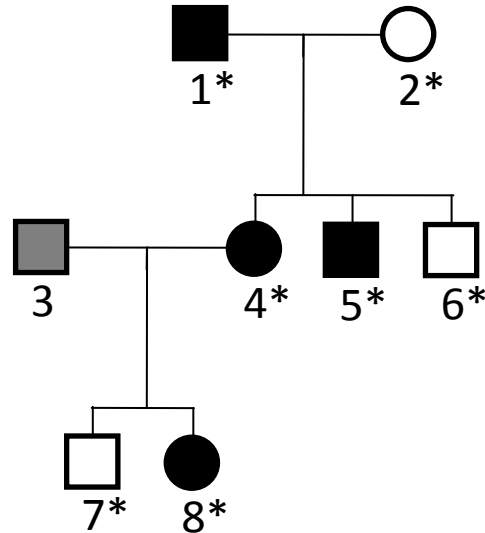

| ID | Platform | Gbp  | Avg Cov | % 10x |
|----|----------|------|---------|-------|
| 1  | SOLiDv4  | 13.4 | 82      | 83.6  |
| 2  | SOLiDv4  | 12.8 | 83      | 84.3  |
| 4  | SOLiDv4  | 11.7 | 43      | 72.3  |
| 5  | SOLiDv4  | 12.7 | 78      | 82.3  |
| 6  | SOLiDv4  | 12.1 | 74      | 81.2  |
| 7  | SOLiDv4  | 13.3 | 79      | 78.8  |
| 8  | SOLiDv4  | 7.3  | 40      | 74.7  |

## Supplementary Figure 2. Knockdown efficiency of morpholinos

A. Schematic depicts the targeted *D. rerio* locus for each gene under investigation; white boxes, untranslated regions; blue boxes, coding exons; red box, morpholino (MO) target site; arrows indicate the position of RT-PCR primers (see B). B. Agarose gel images of *nnt-a*, *nnt-b*, *hacl1*, *nav2*, *rab27a*, and *rbm28* RT-PCR products show reduced (*nnt-a*, *nnt-b*) or alternatively spliced (*hacl1*, *nav2*, *rab27a*, *rbm28*) transcript in MO-injected embryos. *β-actin* is shown as a loading control. C. Quantification of the effects of single or double *nnt-a* and *nnt-b* MO injection at increasing concentrations; cardiac edema formation is used as a phenotypic readout for larval batches embryos scored at 3dpf. Comparisons of equivalent doses for each of *nnt-a* or *nnt-b* MOs alone are not significant (3ng, p=0.13; 6ng, p=0.17, 9ng, p=0.52). D. Quantification of control gene MO injection; cardiac edema formation is used as a phenotypic readout for larval batches scored at 5dpf. Negative control genes (harboring variants shared between the affected individuals in family C but not segregating with disease) show no significant phenotype; *notch1a*, implicated previously in cardiac valve development shows marked cardiac edema. n=50-100 embryos/injection batch, repeated twice with masked scoring.

**A**

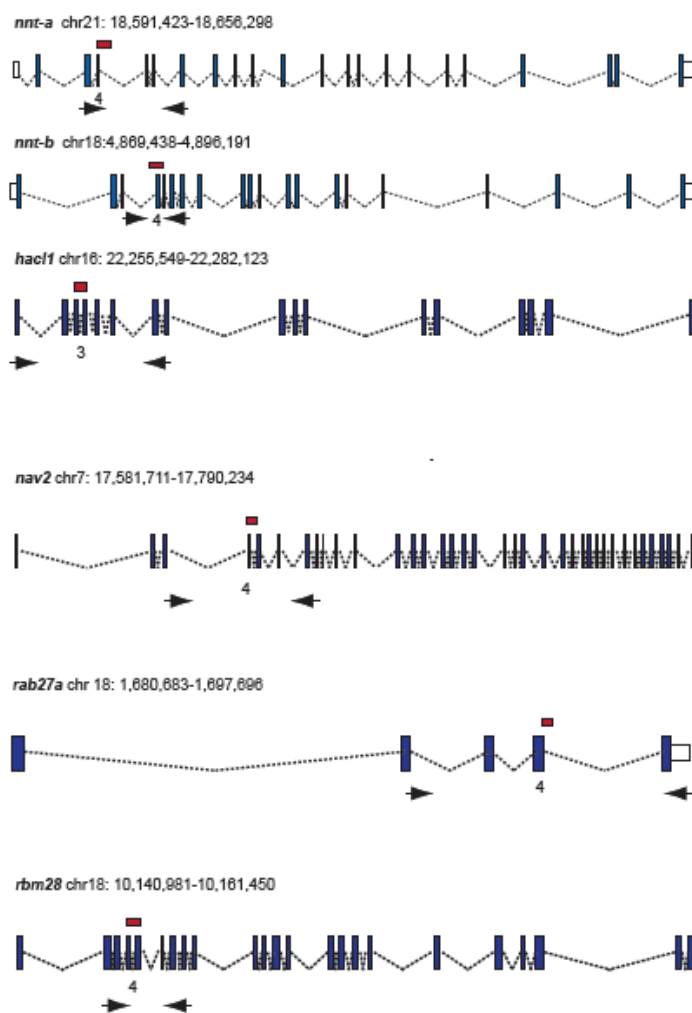

**B**

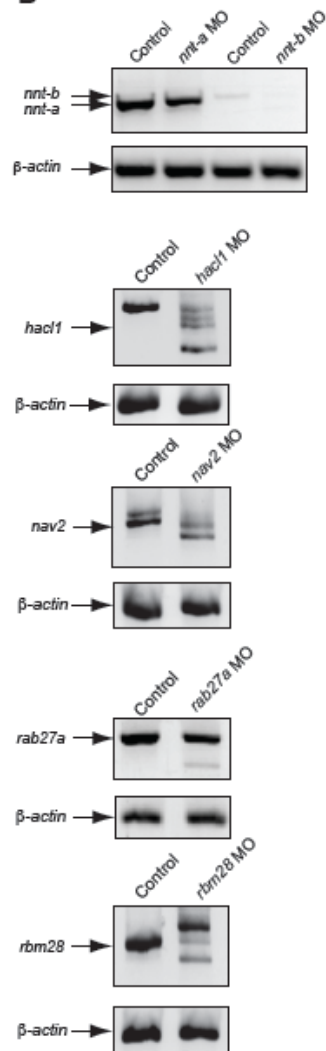

**C**

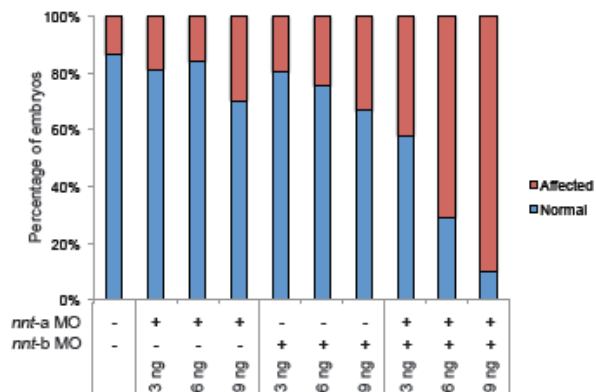

**D**

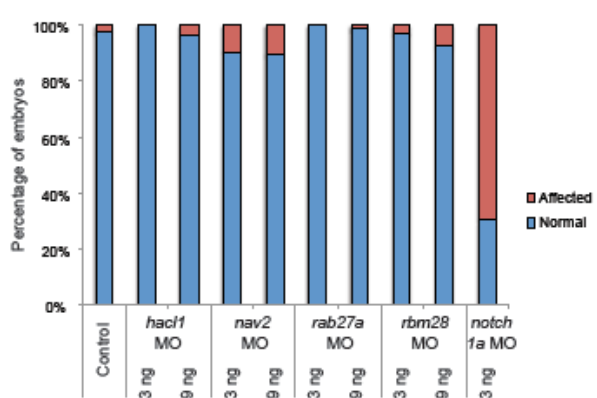



## Supplementary Movies

**Supplementary Movie 1.** Fluorescent video imaging of ventrally positioned 2 dpf control *cm1c2:GFP* larva. Imaging was acquired at 8.77 frames/second at 12x magnification; anterior structures, left; atrium, top chamber; ventricle, bottom chamber.

**Supplementary Movie 2.** Fluorescent video imaging of ventrally positioned 2 dpf *nnt-a/nnt-b* morphant *cm1c2:GFP* larva. Imaging was acquired at 8.77 frames/second at 12x magnification; anterior structures, left; atrium, top chamber; ventricle, bottom chamber.

## References

1. Yeo S-Y, Kim M, Kim H-S, Huh T-L, Chitnis AB. Fluorescent protein expression driven by her4 regulatory elements reveals the spatiotemporal pattern of Notch signaling in the nervous system of zebrafish embryos. *Dev Biol.* 2007;301:555–567.
